# Supplementary material for: Dual‐input tracer kinetic modeling of dynamic contrast‐enhanced MRI in thoracic malignancies
Source: PubMed Central journal article supplement (PMC6839367; doi:10.1002/acm2.12740), 2019-10-11
Supplement: ACM2-20-169-s002.pdf [file ACM2-20-169-s002.pdf]

## Supplementary document 2

Summary of terms and parameters used in the five dual-input models described in this paper

| Term                 | Definition                                                                | Unit of Measure          |
|----------------------|---------------------------------------------------------------------------|--------------------------|
| $C_{PA}(t)$          | Pulmonary arterial blood concentration of CA                              | g/mL                     |
| $C_A(t)$             | Systemic arterial blood concentration of CA                               | g/mL                     |
| $C_T(t)$             | Concentration of CA in tissue                                             | g/mL                     |
| $R_T(t)$             | Tissue residue function                                                   | None                     |
| $Q_{T,PA}(t)$        | Pulmonary impulse response function of the tissue                         | mL/min/mL                |
| $Q_{T,A}(t)$         | Systemic impulse response function of the tissue                          | mL/min/mL                |
| $Q_T(t)$             | Total impulse response function of the tissue                             | mL/min/mL                |
| $F$                  | Total pulmonary plasma flow                                               | mL/min                   |
| $\gamma$             | Pulmonary arterial flow fraction                                          | None                     |
| $F_{PA}$             | Pulmonary arterial plasma flow                                            | mL/min                   |
| $F_A$                | Systemic plasma flow                                                      | mL/min                   |
| $BF$                 | Total pulmonary blood flow                                                | mL/min/100 g             |
| $BF_{PA}$            | Pulmonary arterial blood flow                                             | mL/min/100 g             |
| $BF_A$               | Systemic arterial blood flow                                              | mL/min/100 g             |
| $BV$                 | Blood volume                                                              | mL/100 g                 |
| $MTT$                | Mean transit time                                                         | min                      |
| $PS$                 | Permeability-surface area product                                         | mL/min (or mL/min/100 g) |
| $v_P$                | Fractional plasma volume                                                  | None                     |
| $v_I$                | Fractional interstitial volume                                            | None                     |
| $E$                  | Extraction fraction                                                       | None                     |
| $H_{LV}$             | Hematocrit in major (large) vessels                                       | None                     |
| $H_{SV}$             | Hematocrit in small vessels                                               | None                     |
| $m$                  | Tissue mass                                                               | g                        |
| $\rho_T$             | Tissue density                                                            | g/cm <sup>3</sup>        |
| $V_P$                | Volume of the plasma compartment                                          | mL                       |
| $V_I$                | Volume of the interstitial compartment                                    | mL                       |
| $V_T$                | Tissue volume                                                             | mL                       |
| $F/V_T$              | Total pulmonary perfusion                                                 | mL/min/mL                |
| $F_{PA}/V_T$         | Pulmonary arterial perfusion                                              | mL/min/mL                |
| $F_A/V_T$            | Systemic arterial perfusion                                               | mL/min/mL                |
| $K^{Trans} = EF/V_T$ | Volume transfer constant between the plasma and interstitial compartments | mL/min/mL                |

|             |                                                                                     |     |
|-------------|-------------------------------------------------------------------------------------|-----|
| $V_P/F$     | Capillary transit time                                                              | min |
| $PS/F$      | Capillary leakage time                                                              | min |
| $t_{Lag,T}$ | Difference in bolus arrival time between $C_{PA}(t)$ (or $C_A(t)$ )<br>and $C_T(t)$ | min |

---
